# Supplementary material
Source: publisher figshare collection journal article supplement (https://geolsoc.figshare.com/ndownloader/files/14523932)
Supplement: Supplementary file 1 [file 14523932]

Supplement 1 – Locations

**Wellsville Mountains**

Antimony Canyon, Box Elder County, Utah; Sec. 36 T10N R02W; 41.5610, -112.0060

Calls Fort Canyon, Box Elder County, Utah; Sec. 11, T10N, R02W; 41.6172, -112.0371

Cataract Canyon, Box Elder County, Utah; Sec. 23, T10N, R02W; 41.5950, -112.0284

Donation Canyon, Box Elder County, Utah; Sec. 14, T10N, R02W; 41.6047, -112.0391

Hansen Canyon, Box Elder County, Utah; Sec. 06, T09N, R01W; 41.5465, -111.9965

Miners Hollow, Box Elder County, Utah; Sec. 14, T10N, R02W; 41.6023, -112.0334

**Promontory Mountains**

Promontory Point, Box Elder County, Utah; Sec. 18, T6N, R5W; 41.2558, -112.4591

**Wasatch Range**

Blacksmith Fork, Cache County, Utah; Sec. 18, T10N, R03E; 41.6028, -111.6519

High Creek, Cache County, Utah; Sec. 3 T13N, R02E; 41.8964, -111.7118

**Bear River Range**

Emigration Canyon, Bear Lake County, Idaho; Sec. 14, T12S, R42E; 42.3755, -111.5108

Oneida Narrows, Franklin County, Idaho; Sec. 6, T13S, R41E; 42.3212, -111.7115

Spence Gulch, Bear Lake County, Idaho; Sec. 11, T13S, R42E; 42.3064, -111.5156

Two Mile Canyon; Oneida County, Idaho; Sec. 35, T14S, R36E; 42.1648, -112.2116
